# Supplementary material
Source: PubMed Central journal article supplement (PMC3009817)
Supplement: 1009785107_pnas.201009785SI.pdf [file 1009785107_pnas.201009785SI.pdf]

# Supporting Information

Sarma et al. 10.1073/pnas.1009785107

## SI Materials and Methods

**LNA Nucleofection in Mouse ES Cells.** A total of 16.7 female ES cells were grown in DMEM supplemented with 15% calf serum (hyclone) and LIF. Cells were differentiated in medium without LIF for 6 d before nucleofection. For nucleofection,  $2 \times 10^6$  cells were suspended in 100  $\mu$ L of mES nucleofector solution (Lonza). Cy-3 labeled LNAs were added to a final concentration of 2  $\mu$ M. Cells were transferred to a nucleofection cuvette and processed using the A-30 program. Nucleofected cells were re-suspended in 2 mL of culture medium. A total of 100  $\mu$ L of this suspension was cytospun onto slides at each time point using a Shandon cytospin3 centrifuge. Xist RNA FISH was performed as described in *Materials and Methods*.

**Nascent RNA FISH for PGK1 and HPRT.** FISH probes were prepared by nick translation of BACs for PGK1 and HPRT. A total of 10  $\mu$ g Cot1 DNA and 10  $\mu$ g yeast tRNA was vacuum dried and re-

suspended in 16  $\mu$ L of hybridization buffer containing 50% formamide, 10% dextran, 2 $\times$  SSC, and 0.1% BSA. A total of 100 ng probe in 2  $\mu$ L of hybridization solution was added to the above mix and denatured for 10 min at 80  $^{\circ}$ C and for 10 min at 37  $^{\circ}$ C. A total of 2  $\mu$ L of RNase inhibitors was added to the probe mix to a final volume of 20  $\mu$ L. A total of 10  $\mu$ L of probe was used per slide. Slides were incubated overnight at 37  $^{\circ}$ C. After hybridization, slides were washed twice in buffer containing 50% formamide in 2 $\times$  SSC at 37  $^{\circ}$ C and twice in 2 $\times$  SSC buffer at 37  $^{\circ}$ C. Slides were then mounted with Vectashield containing DAPI and visualized immediately.

**Nucleofection of siRNAs and shRNAs.** siRNA and shRNA duplexes identical to the LNA-C1 sequence were synthesized and 2  $\mu$ M were nucleofected in parallel with LNA-C1 using the T-20 program as described in *Materials and Methods*. Slides were processed for RNA FISH as described.

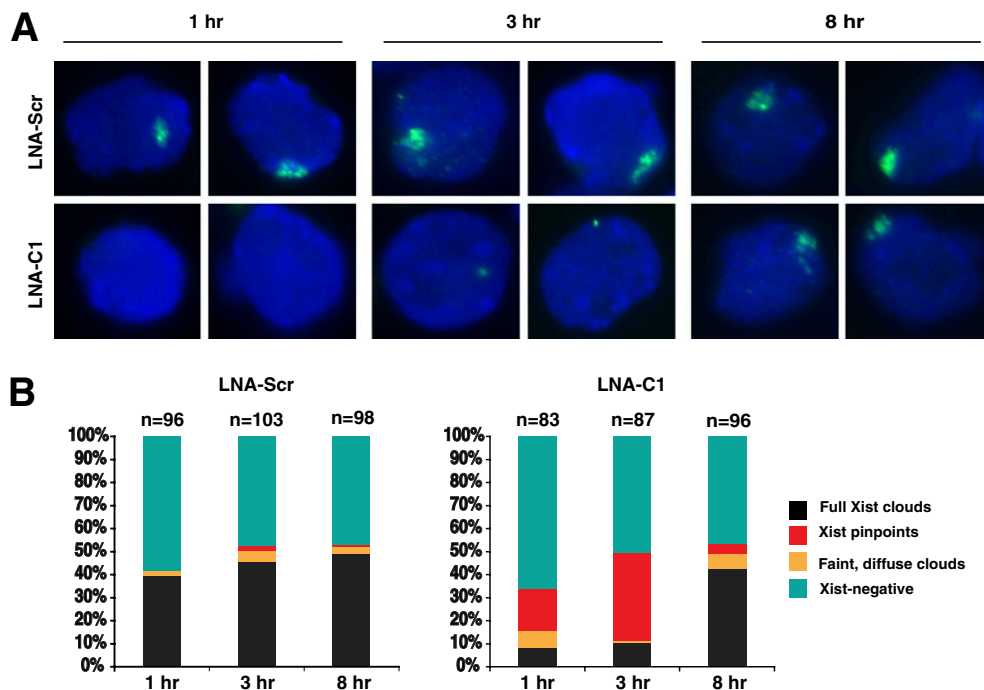

**Fig. S1.** Nucleofection of LNA-C1 into female mouse ES cells results in loss of Xist RNA from the Xi by 1 h and recovery by 8 h. Xist RNA FISH (green) at indicated time points after LNA-C1 nucleofection in mESCs. Two representative images are shown for each time point. Quantitation of results shown in A.

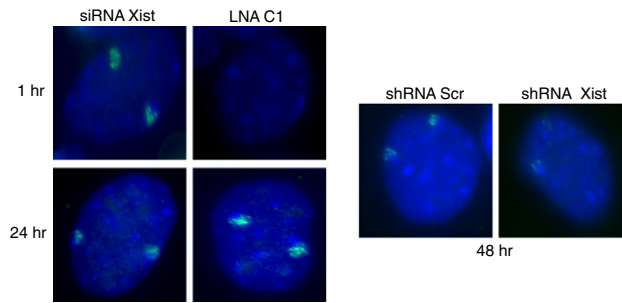

**Fig. S2.** Comparative kinetics of LNA versus siRNAs and shRNAs. siRNAs toward Xist repeat C do not result in displacement of Xist at the 1-h time point, whereas LNAs do. Treatment with shRNAs for 48 h is required for mild Xist knockdown. Xist RNA, green.

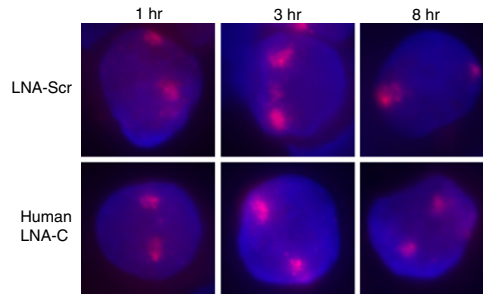

**Fig. S3.** Human XIST repeat C is not required for localization of RNA to Xi. XIST RNA FISH (red) in 293 cells at indicated time points after LNA-Scr or LNA-C1 nucleofection.

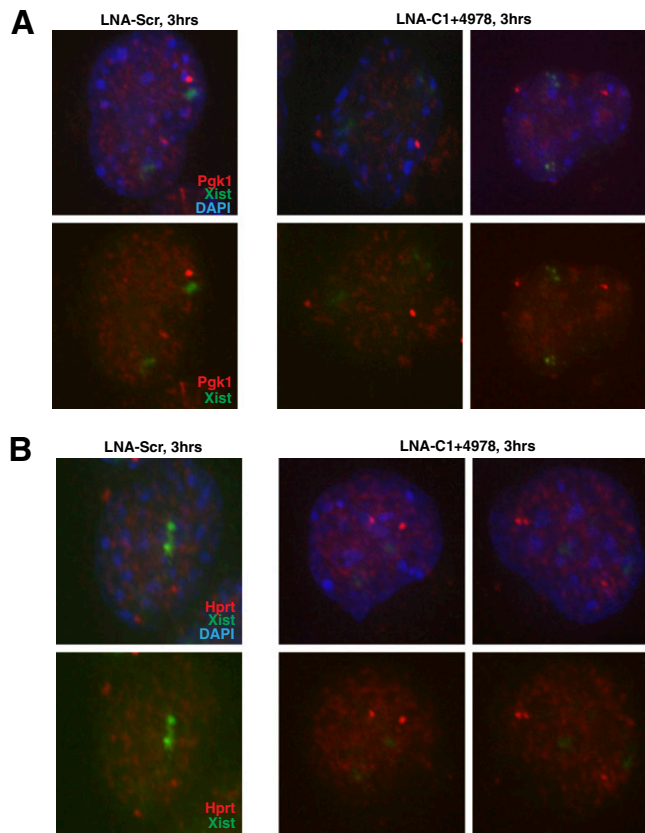

**Fig. S4.** Genes that are silenced on the Xi are not reactivated upon displacement of Xist by LNAs. Two-color RNA FISH detecting Xist RNA and either Pgk1 (A) or Hprt (B) nascent RNAs at 3 h after MEFs were nucleofected with LNA-Scr or repeat C LNAs (LNA-C1 and LNA-4978).
